# Supplementary material for: Clinical practice guidelines for the prevention and treatment of EGFR inhibitor-associated dermatologic toxicities
Source: Springer Nature journal article supplement (doi:10.1007/s00520-011-1197-6), 2011-05-31
Supplement: MOESM2 [file 8572494]

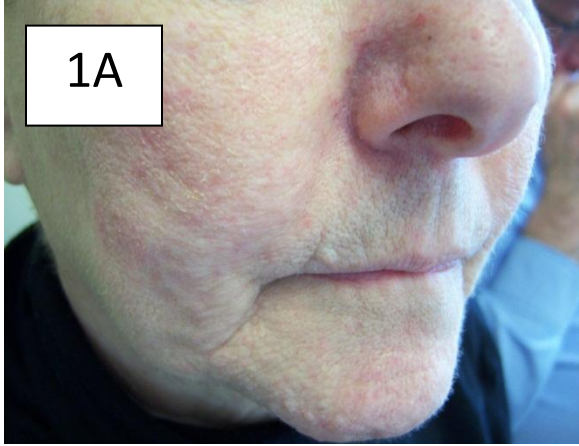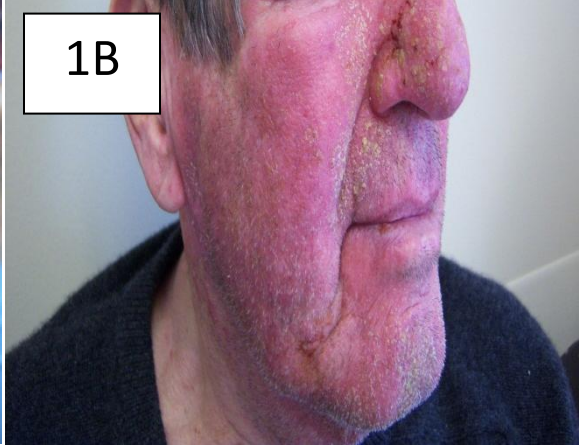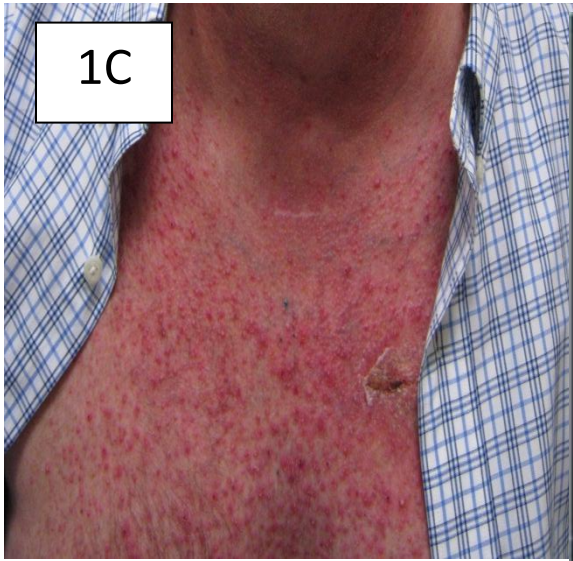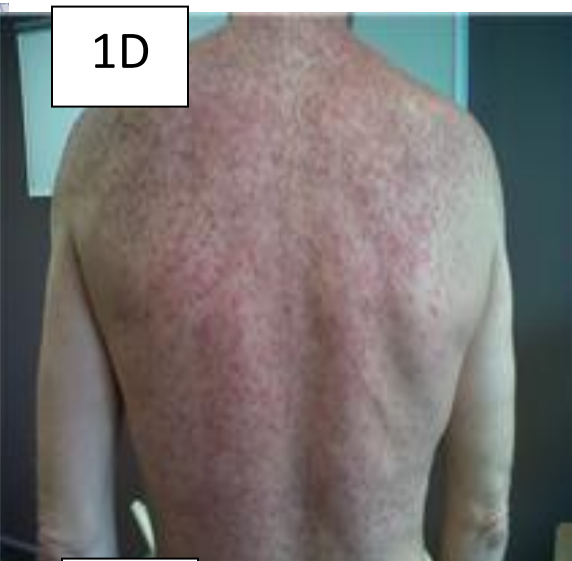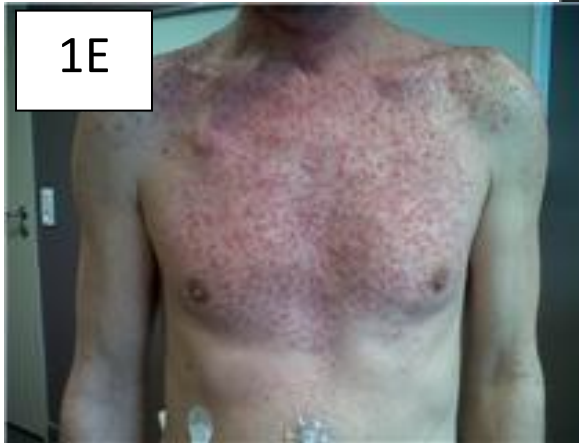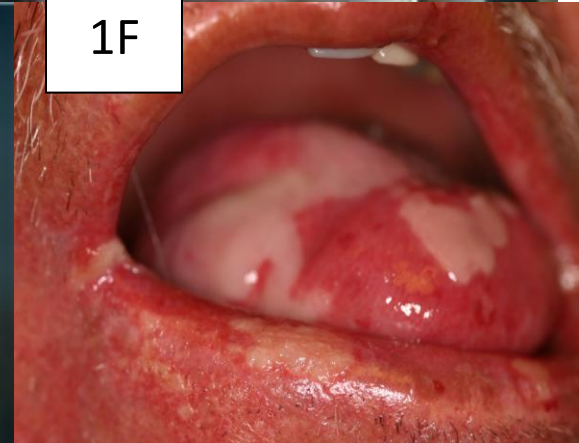

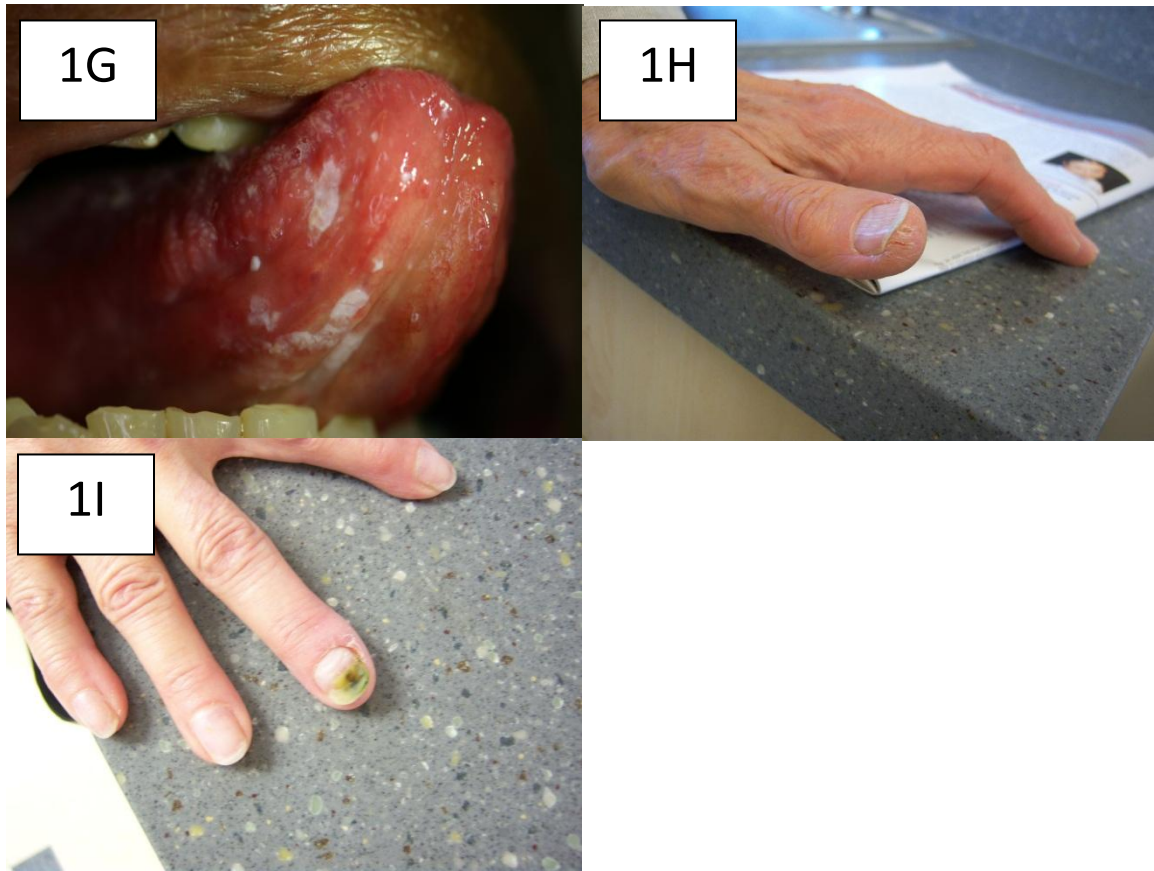

Figure 1: 1A) Mild papulopustular (acneiform) rash 1B and 1C) papulopustular (acneiform) rash  
1D and 1E) radiation dermatitis 1F and 1G) mucositis 1H) fingertip fissure 1I) paronychia
